# Supplementary material
Source: publisher site journal article supplement (https://www.dovepress.com/article/273783)
Supplement: Supplementary file 1 [file get_supplementary_file.php]

**Fig. S1**

**
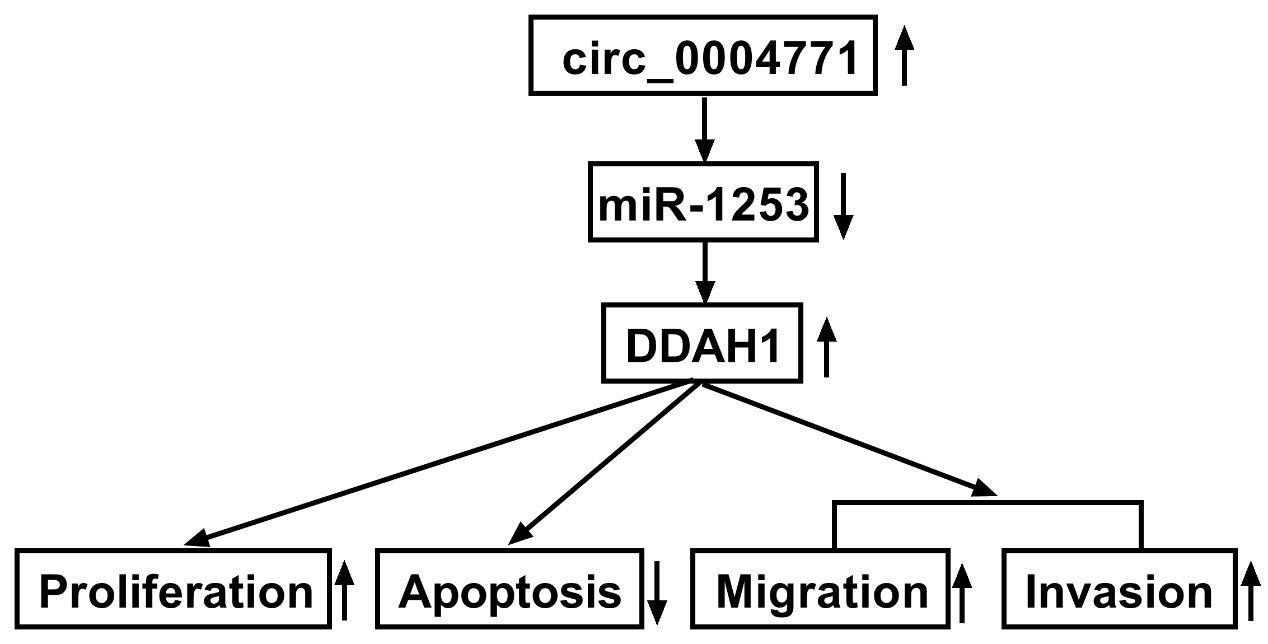
**

**Fig. S1** **Schematic illustration of the circTADA2A/miR-203a-3p/CREB3 axis.** CircTADA2A promoted BC cell proliferation, migration, invasion and induced apoptosis through up-regulating CREB3 via absorbing miR-203a-3p.
